# Supplementary material
Source: ML conference proceedings conference paper supplement (https://proceedings.mlr.press/v183/shi22a.html)
Supplement: Supplementary file [file shi22a-supp.pdf]

Appendix A. Example class distributions of the imbalanced data and hyperparameters used

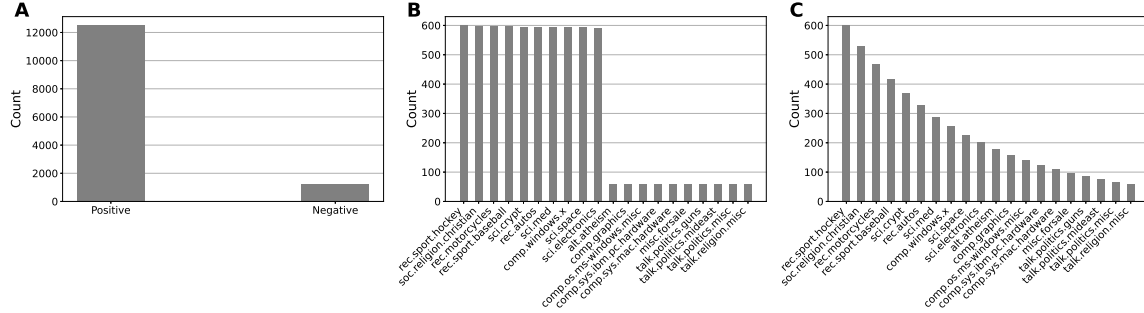

**Figure 6:** Number of training samples per class in artificially created imbalanced data. (A) The IMDB with step-imbalance class distribution. (B) The 20 Newsgroups with step-imbalance class distribution. (C) The 20 Newsgroups with long-tailed class distribution.

**Table 2:** Hyperparameters used for individual datasets

|                         |                                       | IMDB      | 20 Newsgroups | ADME      |
|-------------------------|---------------------------------------|-----------|---------------|-----------|
| Batch Size              |                                       | 8         | 8             | 16        |
| Maximum Sequence Length |                                       | 512       | 512           | 128       |
| Vanilla Finetuning      | Learning Rate                         | 1e-5      | 1e-5          | 1e-5      |
|                         | Epoch                                 | 3         | 5             | 3         |
| Pre-finetuning with DA  | # of Top Layers                       | 1         | 1             | 1         |
|                         | Learning Rate (Pre-finetune/Finetune) | 1e-4/1e-5 | 1e-4/1e-5     | 1e-4/1e-5 |
|                         | Epoch (Pre-finetune/Finetune)         | 1/2       | 1/5           | 1/3       |

Appendix B. Results of the 20 Newsgroups Dataset

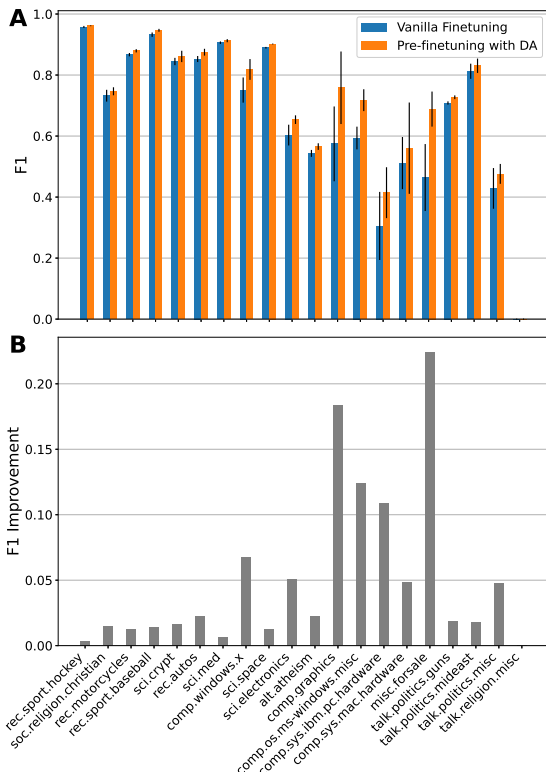

**Figure 7:** Per-class F1 comparison between the vanilla finetuning and our method on the 20 Newsgroups benchmark with *long-tailed* data. A: Comparison of the F1 between the vanilla finetuning and our method. The error bar: SEM. B: The absolute improvements, where substantial improvements were observed in minority classes.

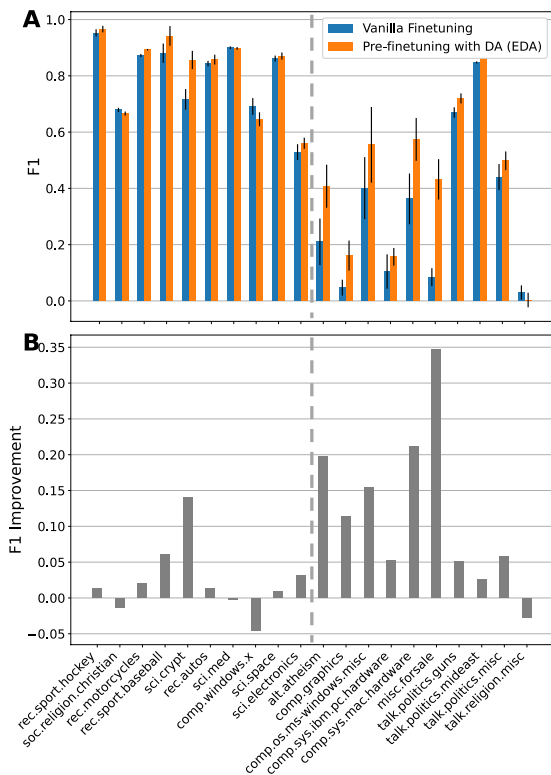

**Figure 8:** Per-class F1 comparison between the vanilla finetuning and our pre-finetuning with data augmentation by *EDA* on the 20 Newsgroups data with *step-imbalance*. The classes on the left of the dash line are the majority classes, and the ones on the right are the minority classes. A: Comparison of the F1 between the vanilla finetuning and our method. The error bar: SEM. B: The absolute improvements, where substantial improvements were observed in minority classes, which have a similar trend as the back translation.

Appendix C. Results of Imbalanced Testing Dataset

Table 3: F1 and per-class F1 (SEM) of IMDB benchmark with the step-imbalance testing data

|                        | F1              | Per-class F1    |                 |
|------------------------|-----------------|-----------------|-----------------|
|                        |                 | Negative        | Positive        |
| Vanilla Finetuning     | 0.9637 (0.0003) | 0.7869 (0.0028) | 0.9801 (0.0001) |
| Pre-finetuning with DA | 0.9657 (0.0005) | 0.7982 (0.0029) | 0.9812 (0.0002) |

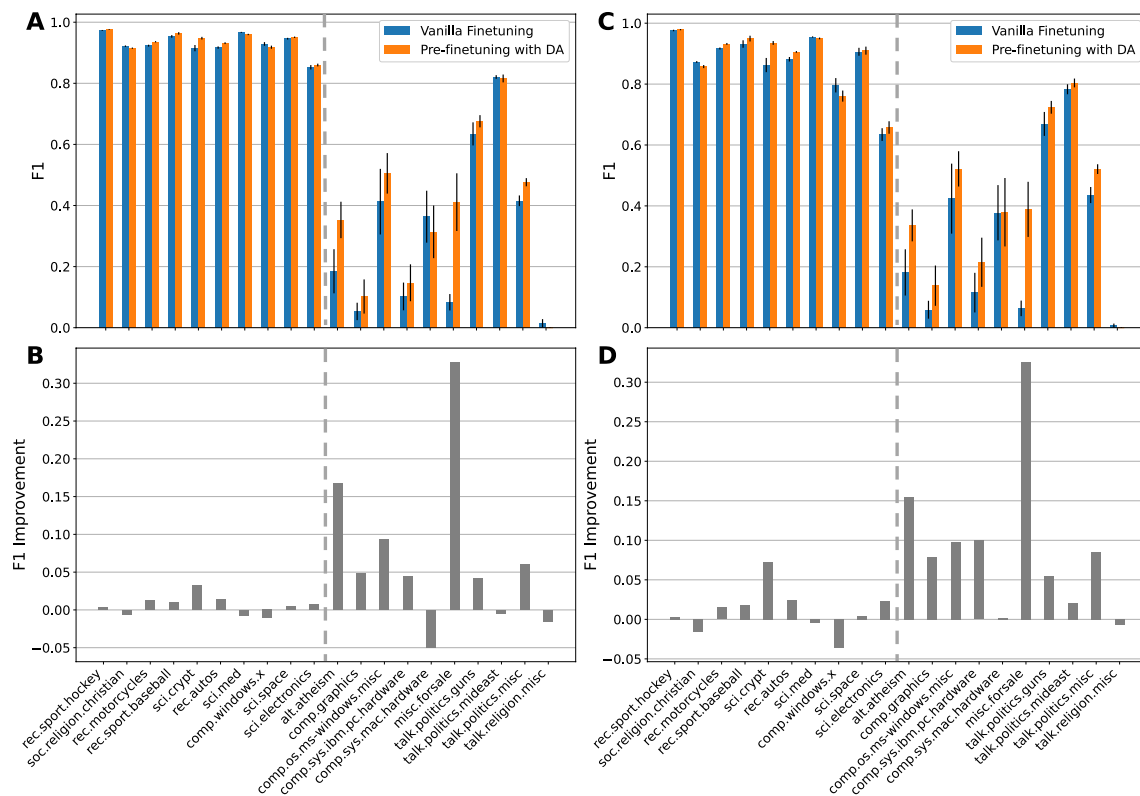

Figure 9: Per-class F1 comparison between the vanilla finetuning and our method on the 20 Newsgroups data with *step-imbalance*. A, B: The per-class F1 and improvements with *step-imbalance* testing dataset, respectively. C, D: The per-class F1 and improvements with *long-tailed* testing dataset, respectively. The classes on the left of the dash line are the majority classes, and the ones on the right are the minority classes. The per-class F1 of minority classes had more improvements, a trend similar to that in the balanced testing dataset.

## Appendix D. Results for the 5-fold Cross Validation

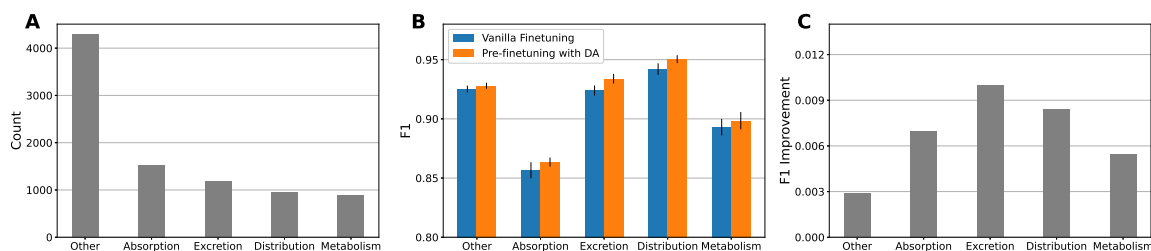

**Figure 10:** Per-class F1 scores and improvements on ADME dataset with stratified 5-fold cross validation. A: The class distribution of the training set. B: The per-class F1-score comparison between the two methods (The vanilla method and our pre-finetuning with DA). C: Improvement in per-class F1 of our method over the vanilla method. The F1-score increase is observed in all classes with our method. The improvement becomes larger in the less frequent classes. Error bars: SEM.
